# Supplementary material for: Outcome of E1224-Benznidazole Combination Treatment for Infection with a Multidrug-Resistant Trypanosoma cruzi Strain in Mice
Source: PubMed Central journal article supplement (PMC5971593; doi:10.1128/aac.00401-18), 2018-05-25
Supplement: AAC.00401-18_zac006187176s1.pdf [file AAC.00401-18_zac006187176s1.pdf]

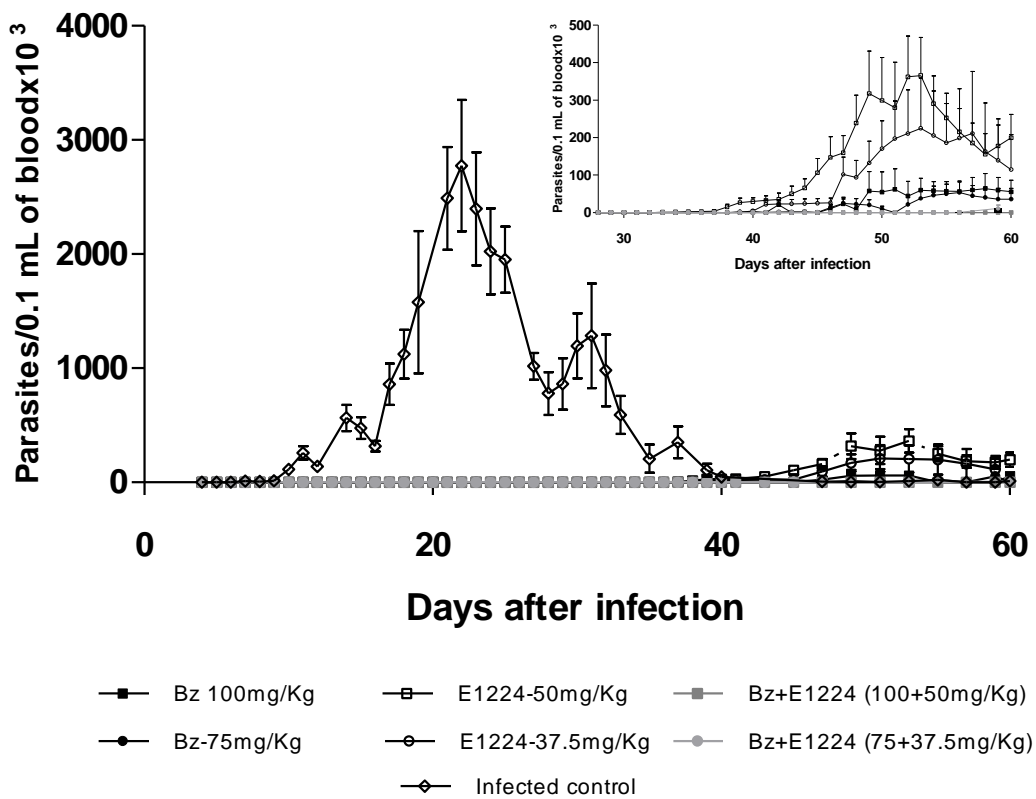

Figure S1 – Parasitemia levels after oral administration of E1224 or benznidazole in monotherapy or combination. Parasitemia curve obtained from mice infected with 5000 trypomastigotes of *T. cruzi* Colombian strain and treated daily with 50 or 37.5 mg/kg of E1224 and 100 or 75 mg/kg of benznidazole alone or in combination for 20 consecutive days. Treatments were started at day 4 of infection. The graph inset shows parasitemia curve only of the treated groups after the treatment period.
